# Supplementary material
Source: PubMed Central journal article supplement (PMC7588308)

Extended Data Figure 1b

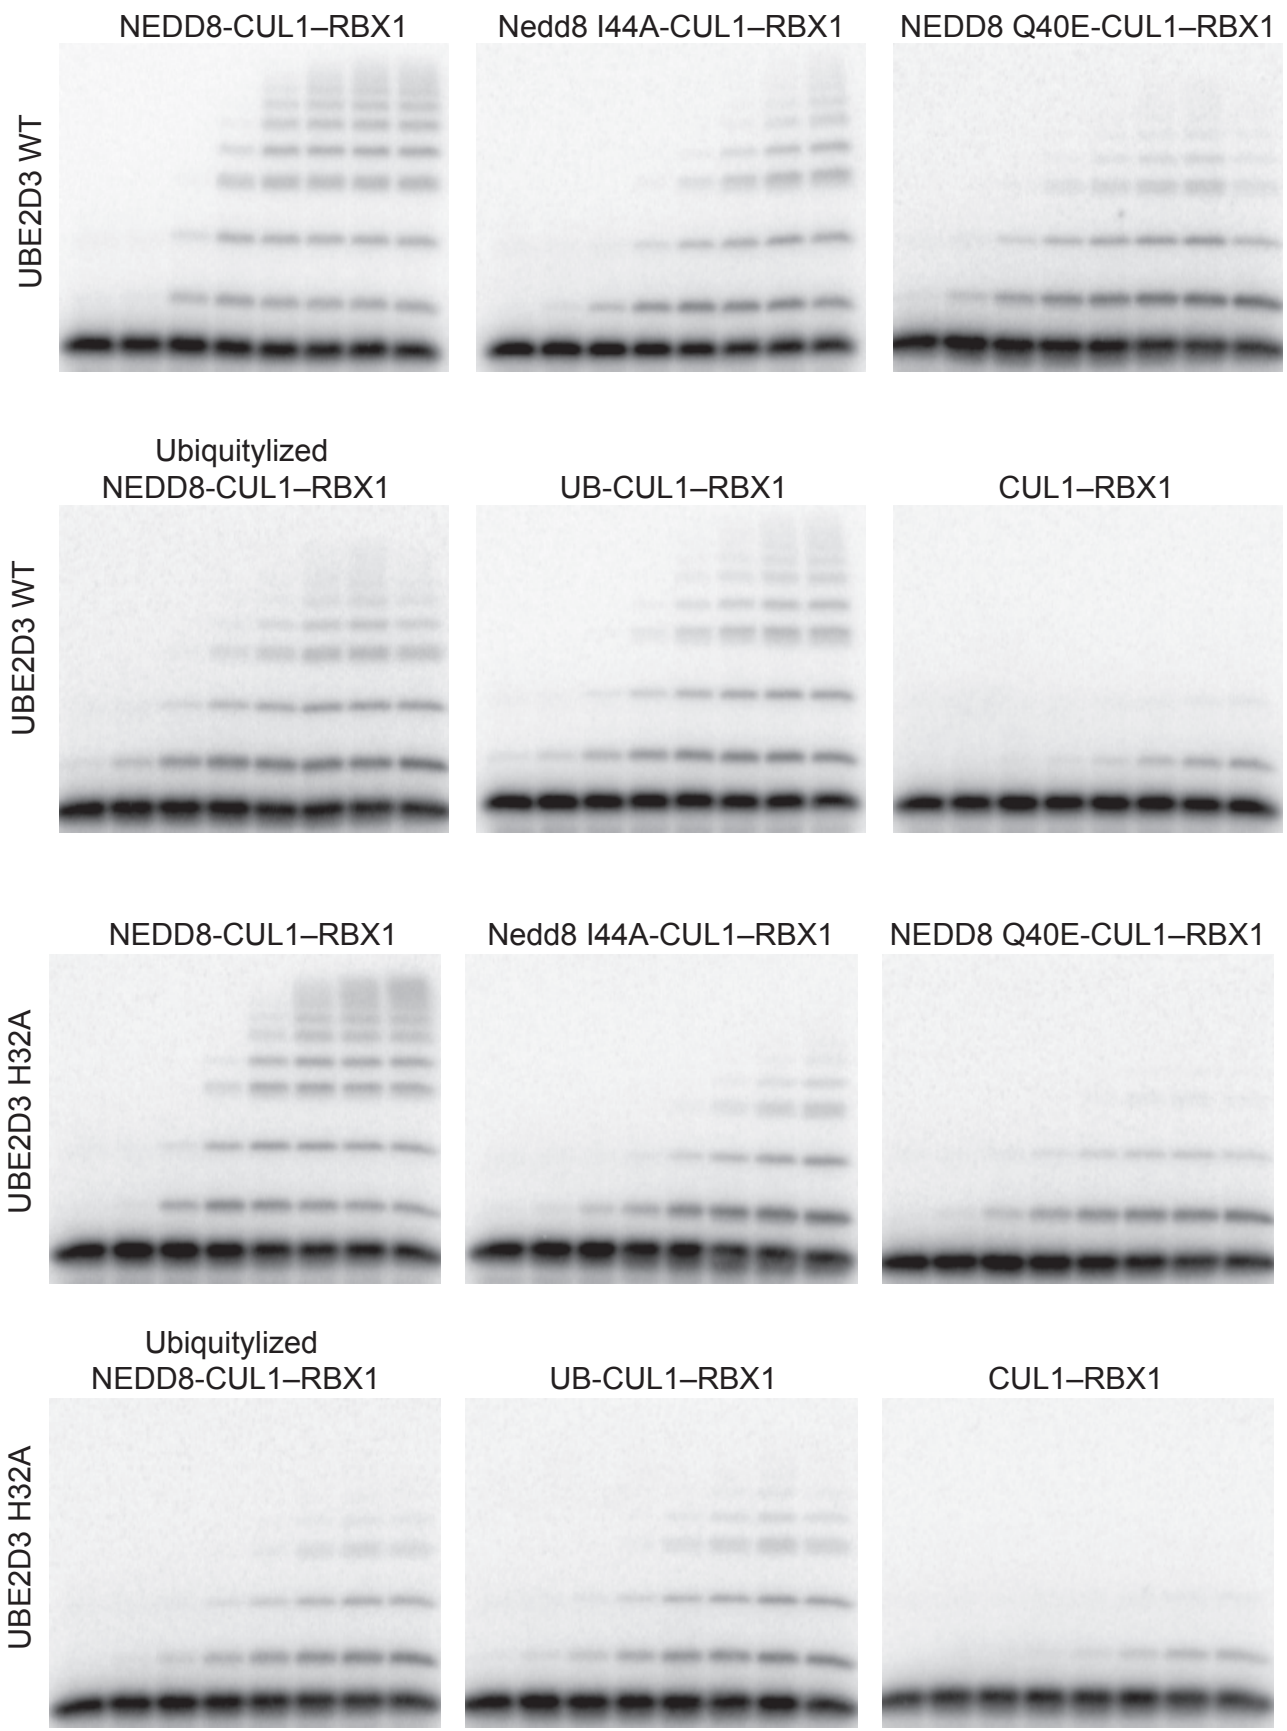

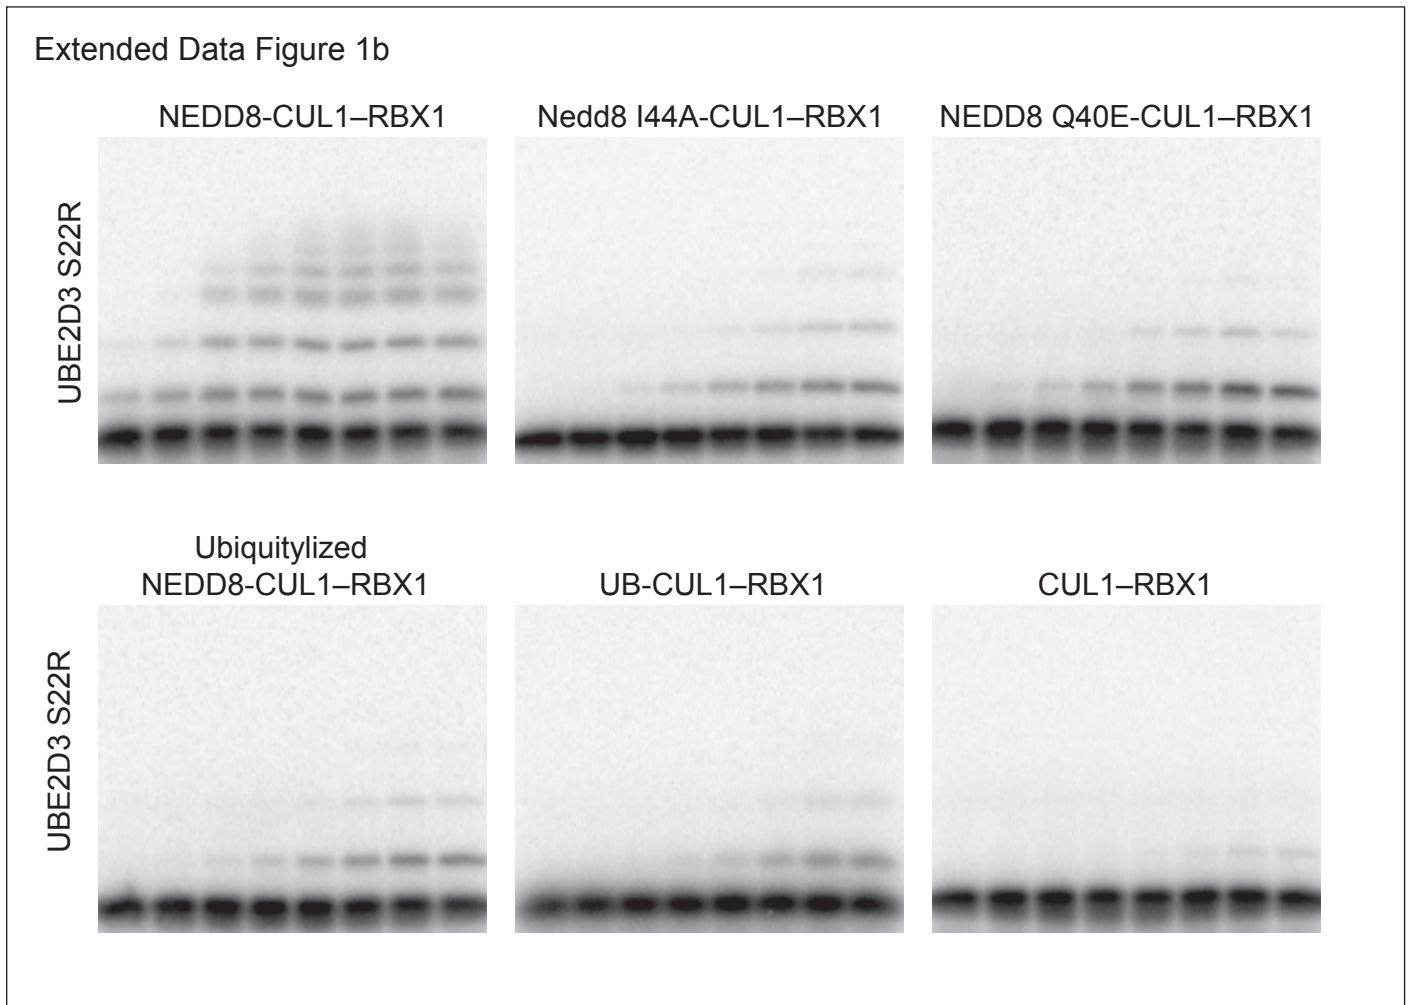

Extended Data Figure 1c left panel

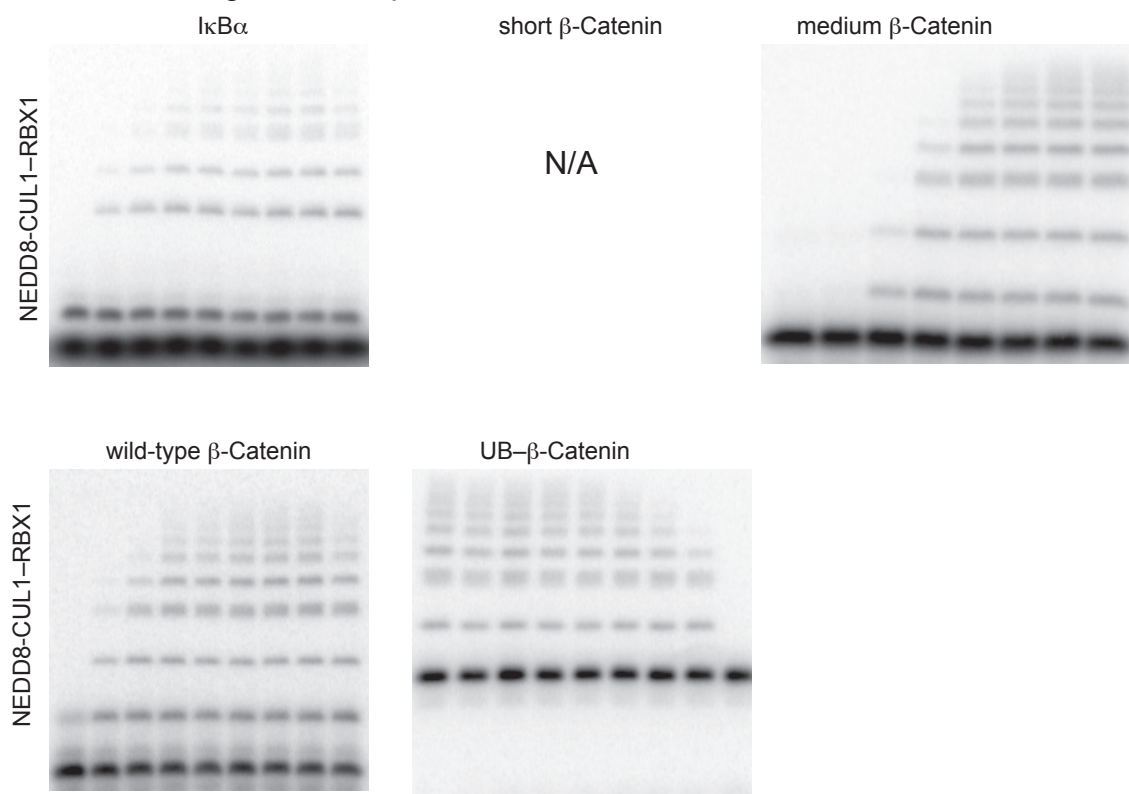

Extended Data Figure 1c right panel

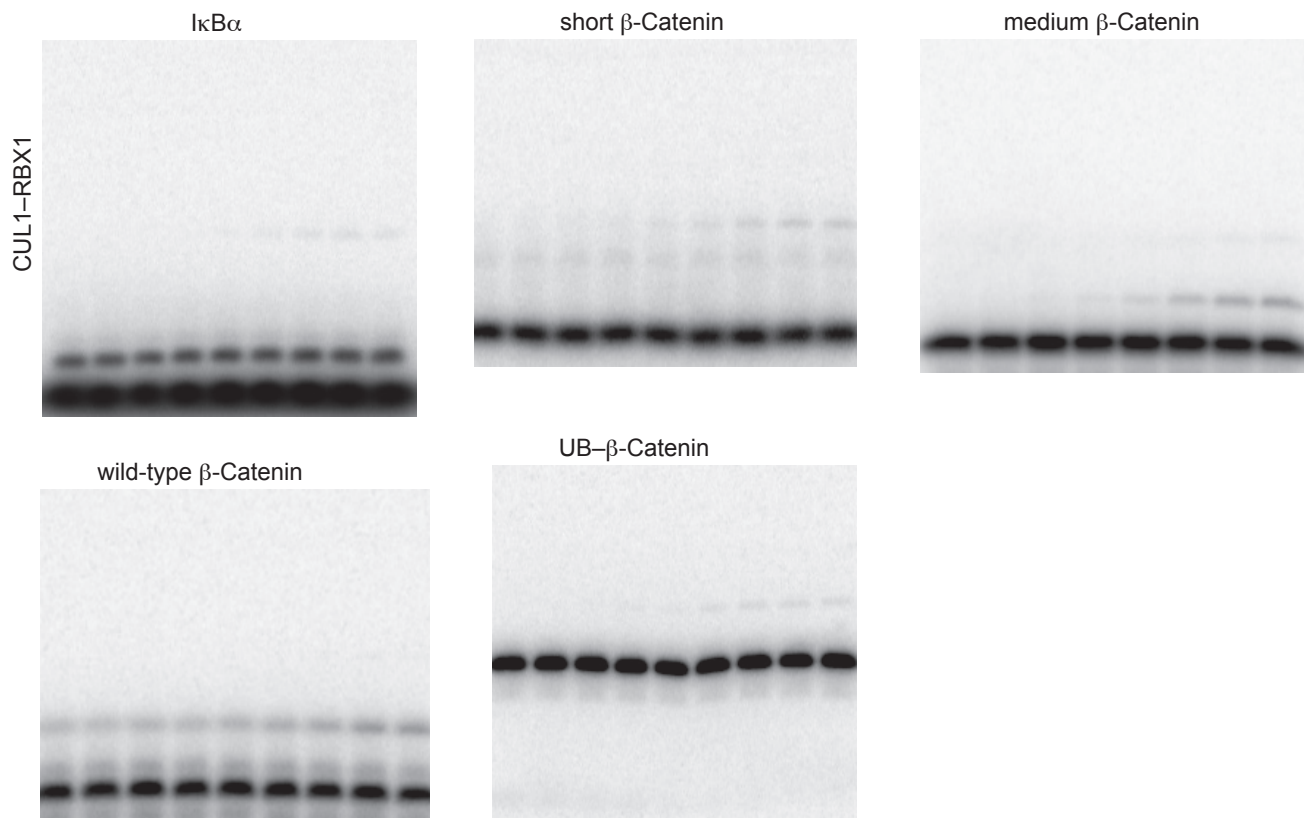

Extended Data Figure 1e upper panel

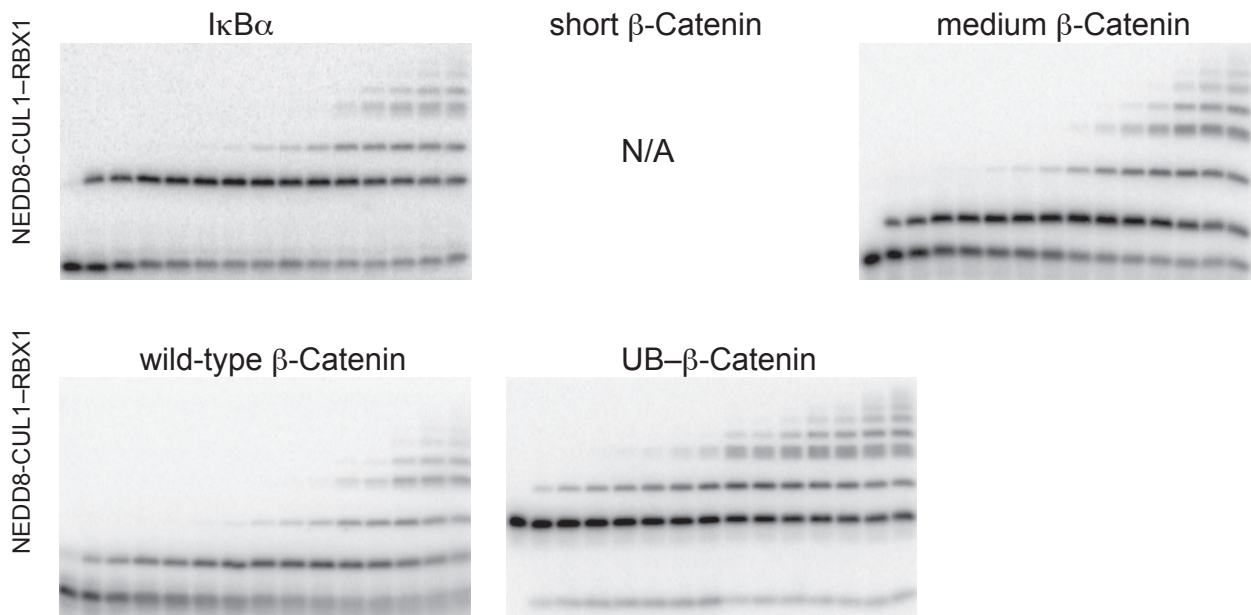

Extended Data Figure 1e lower panel

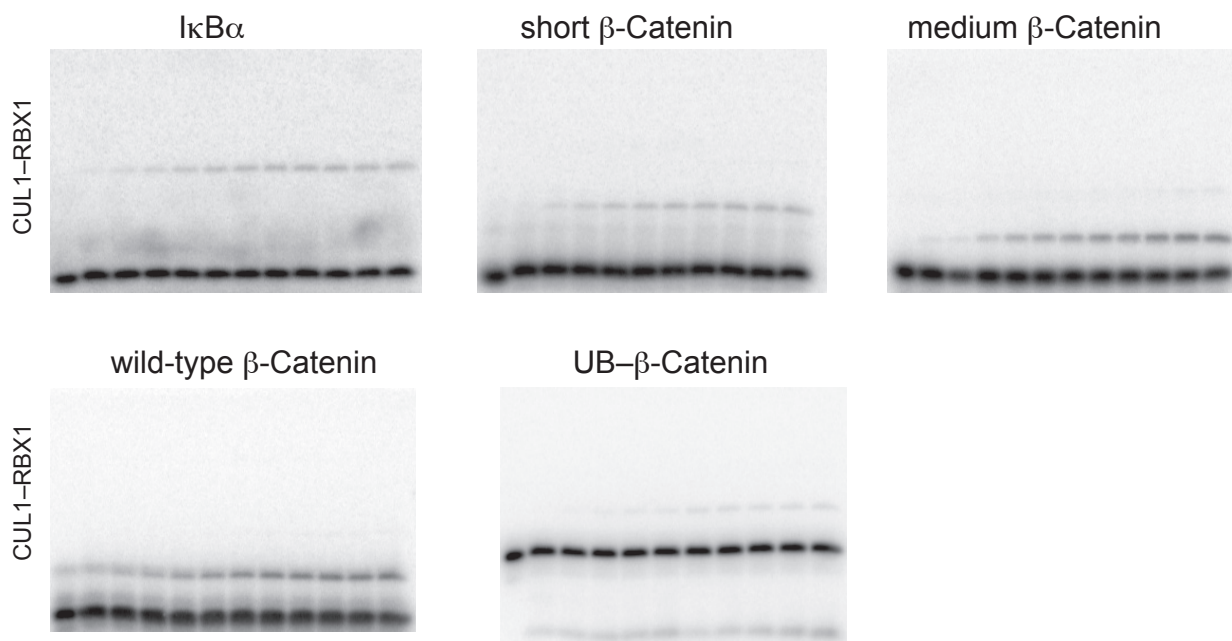

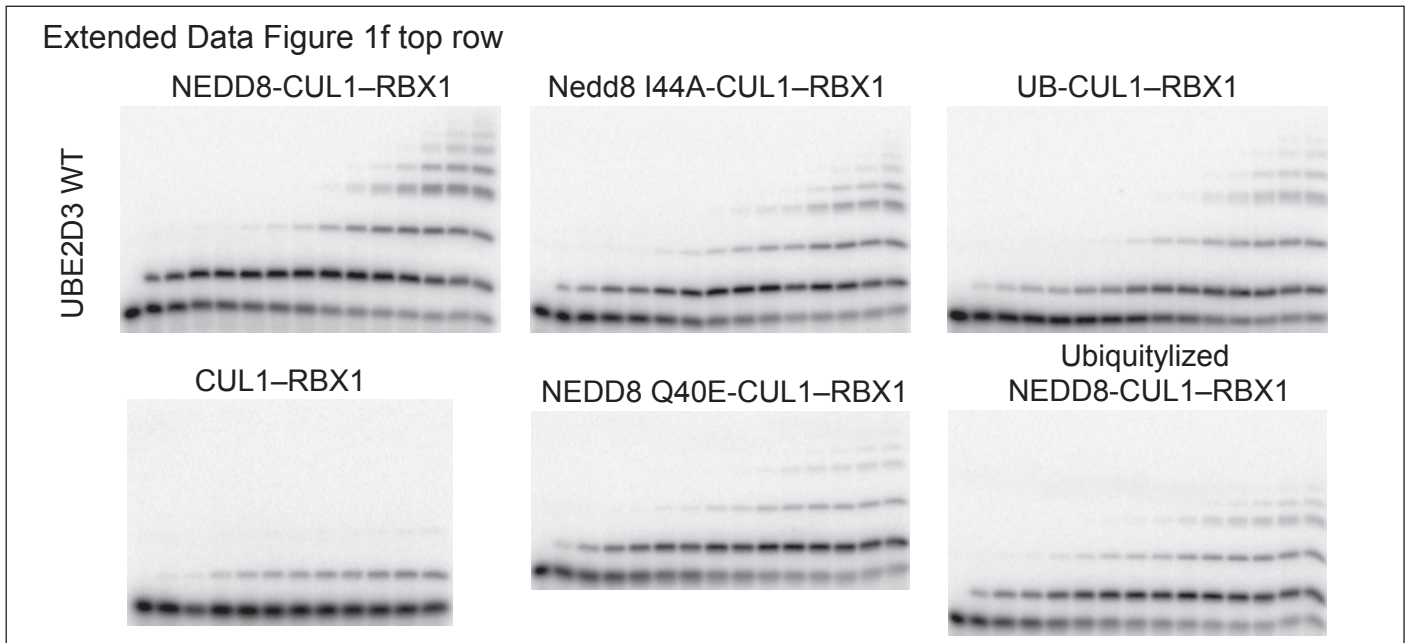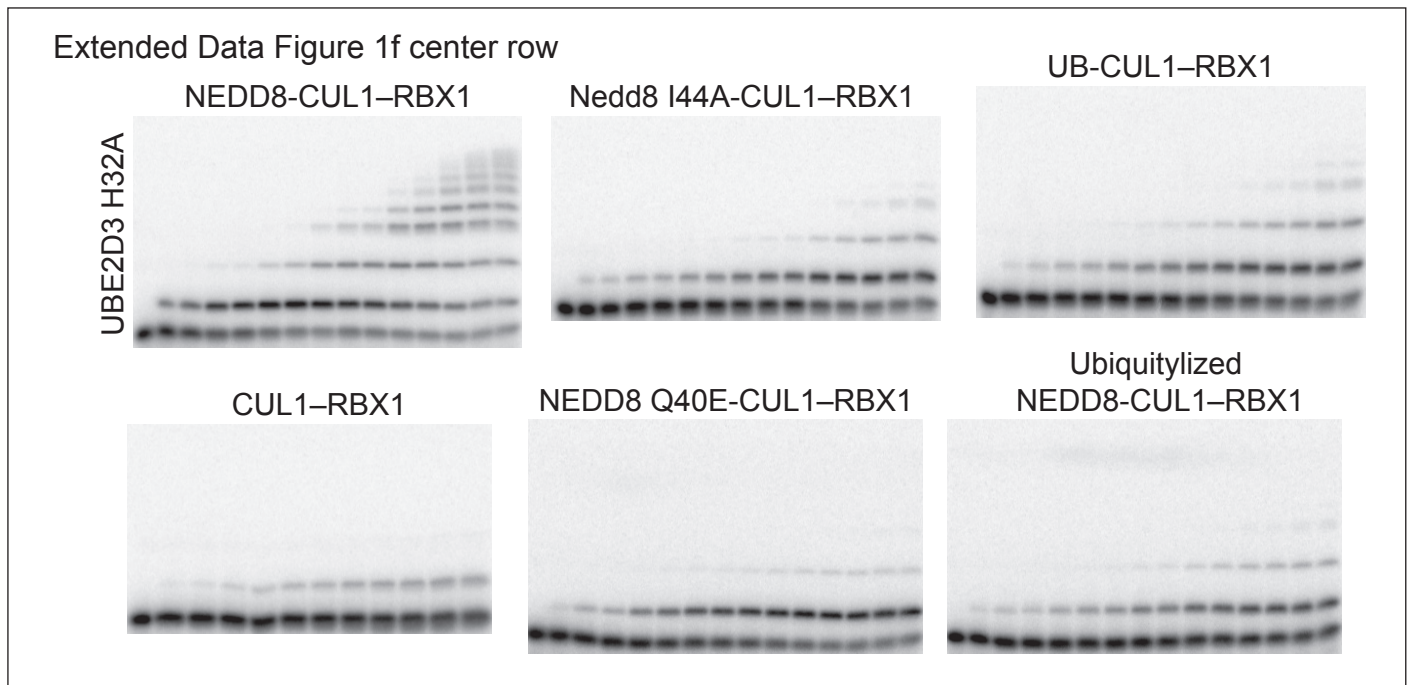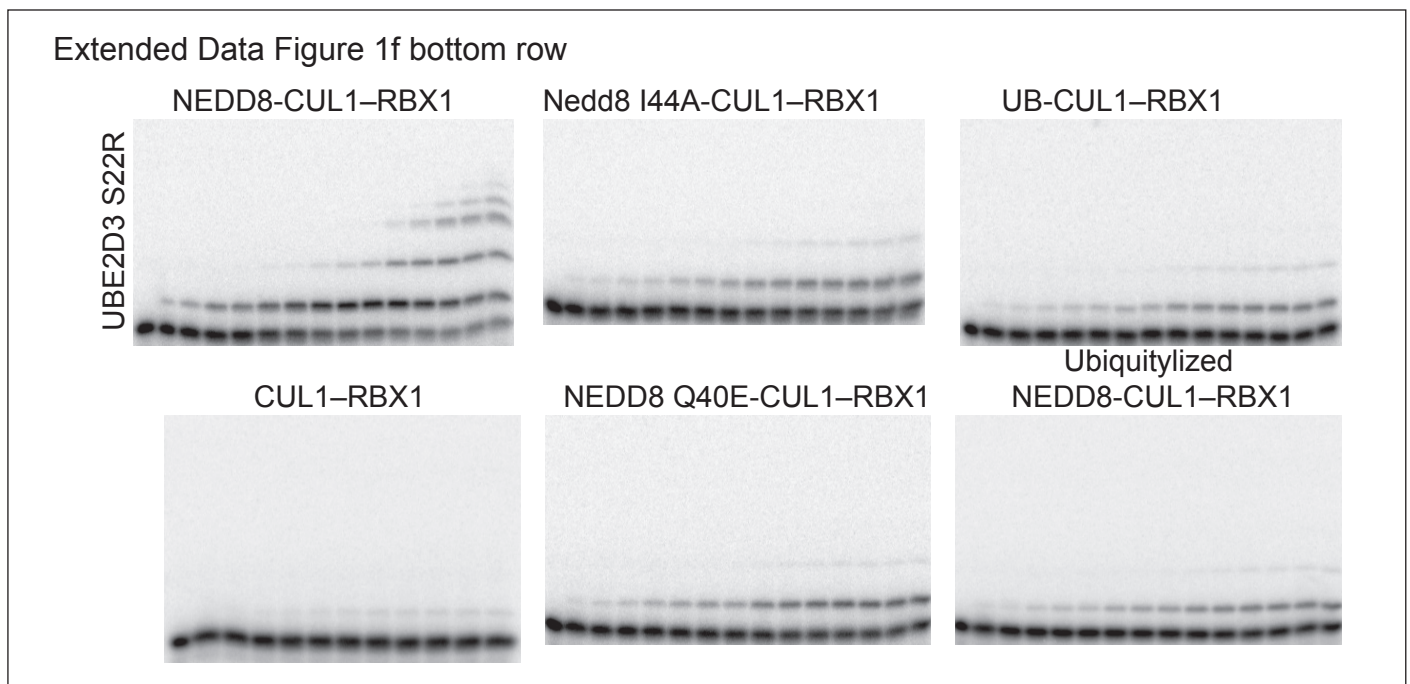

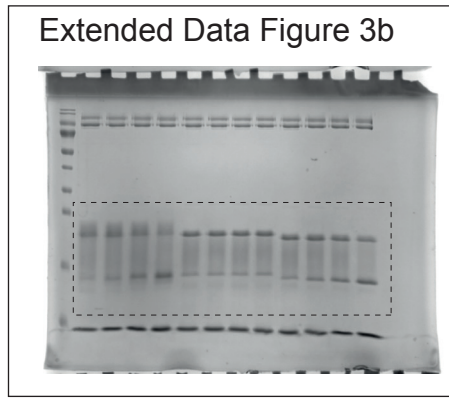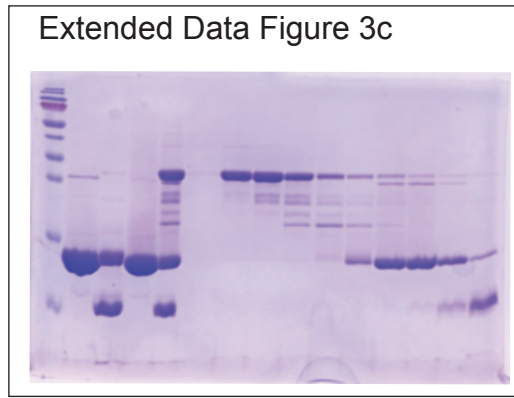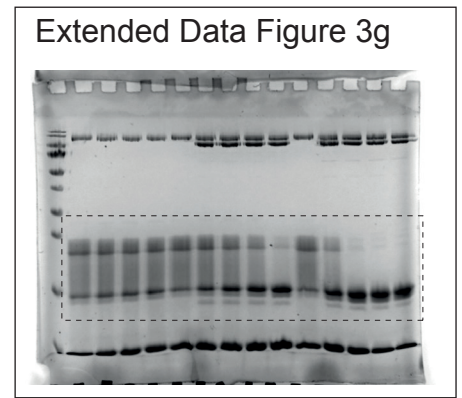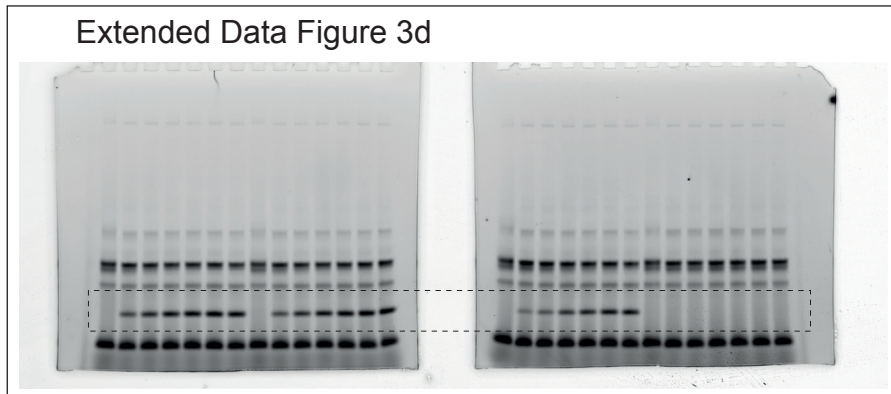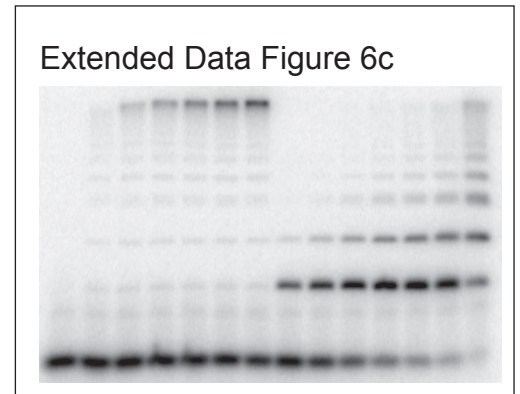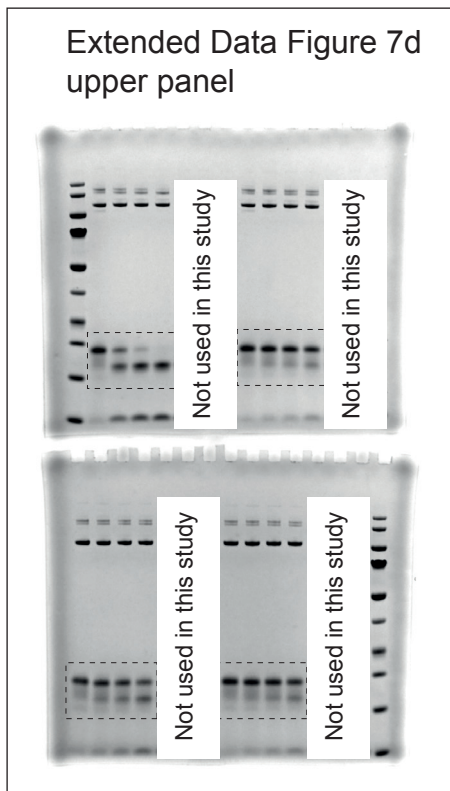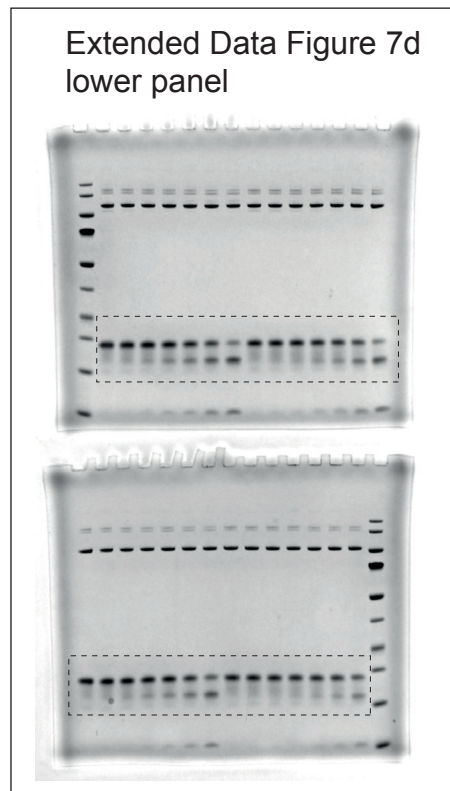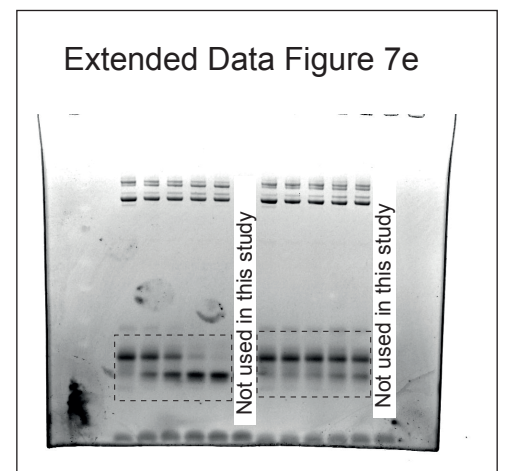

Extended Data Figure 7f  
upper panel

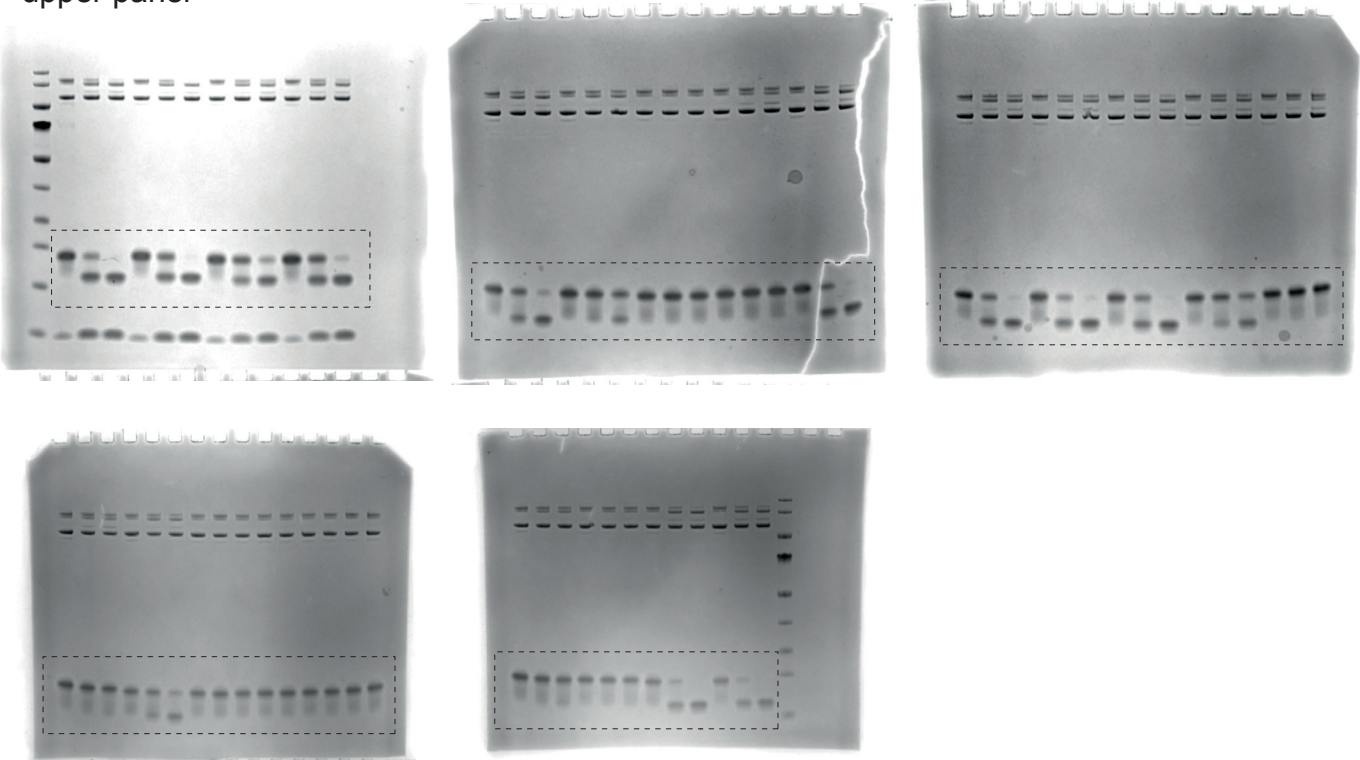

Extended Data Figure 7f  
center panel

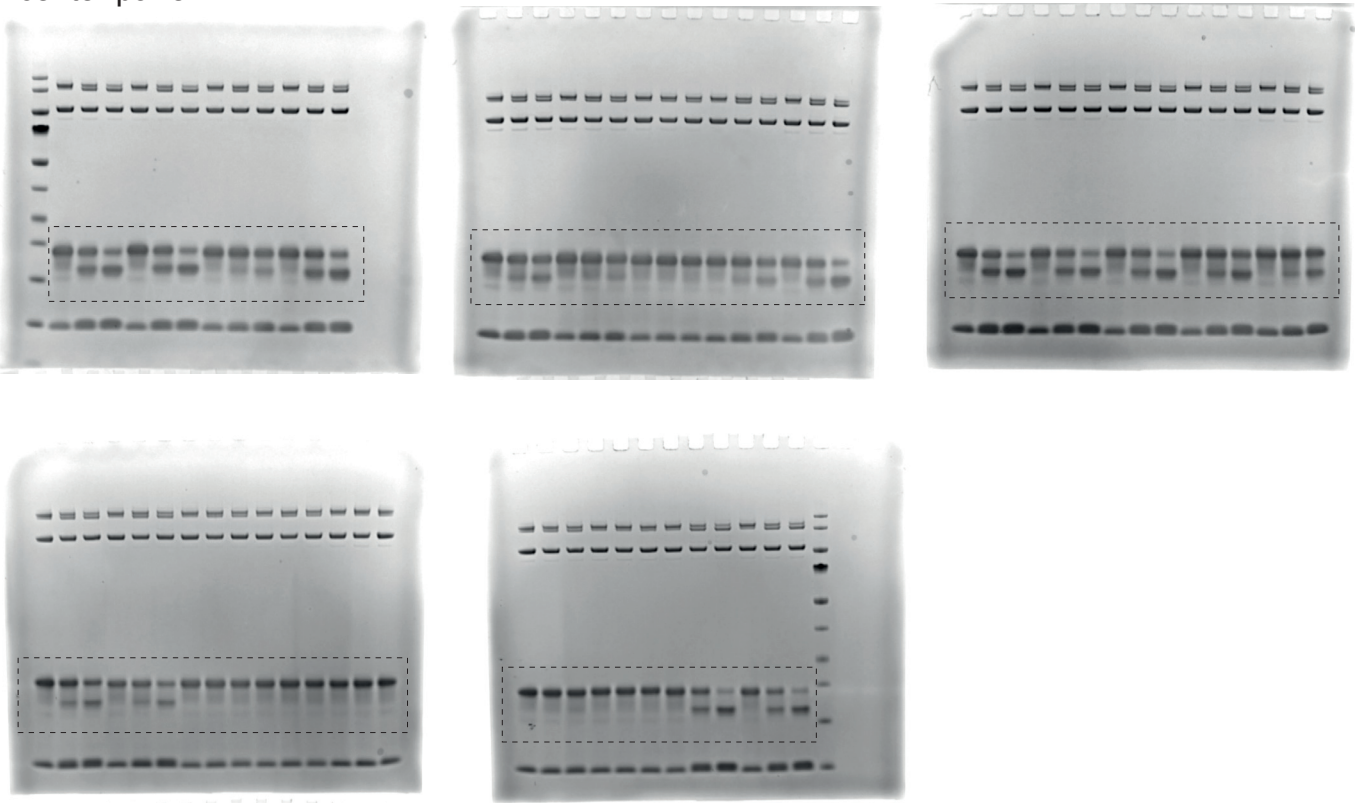

Extended Data Figure 7f  
lower panel

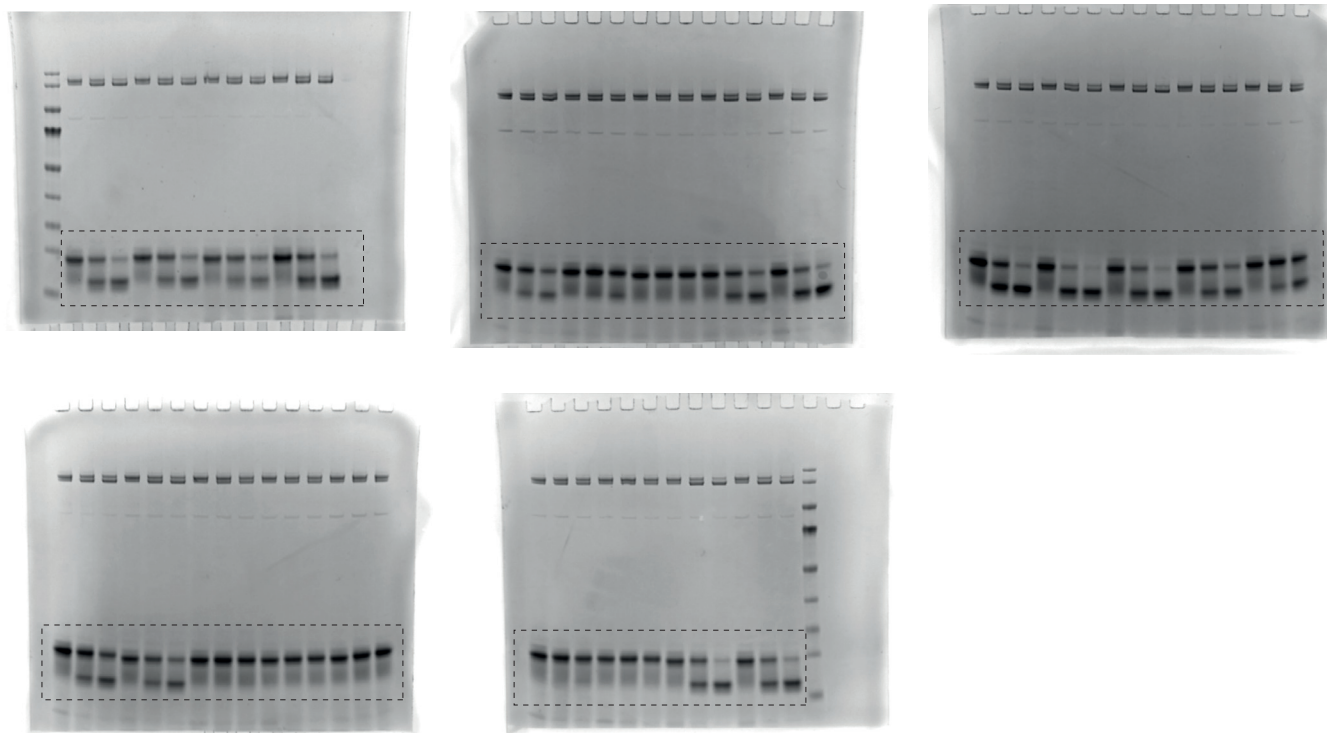



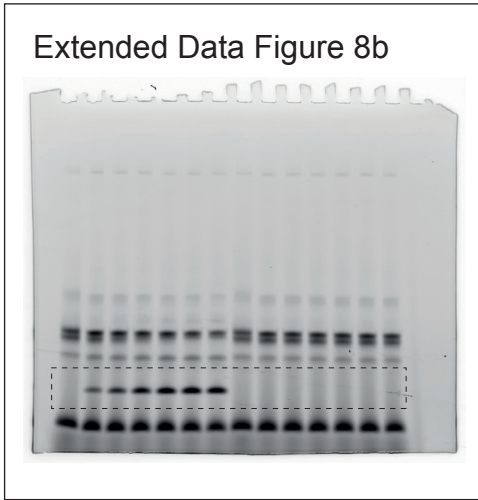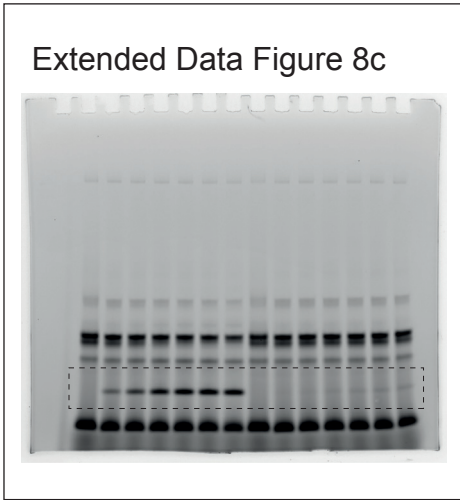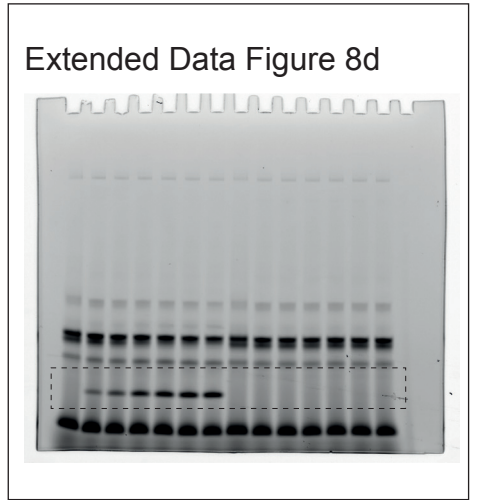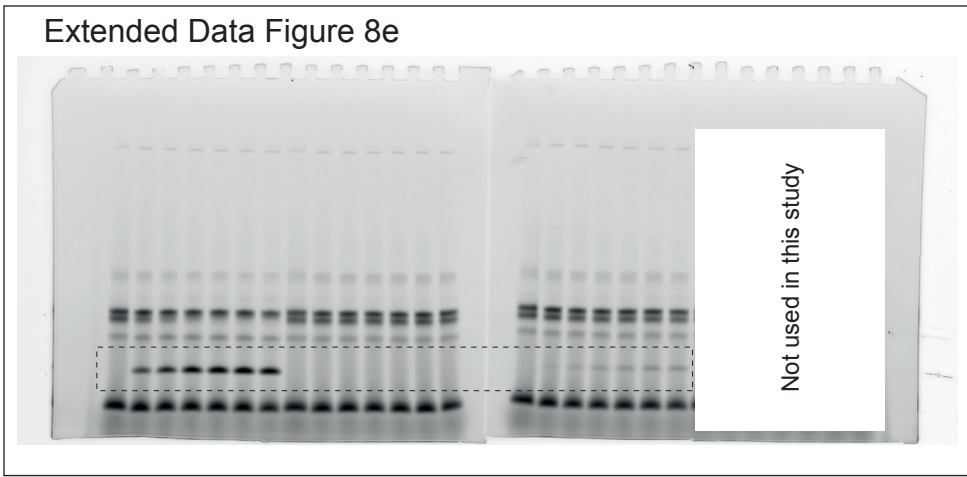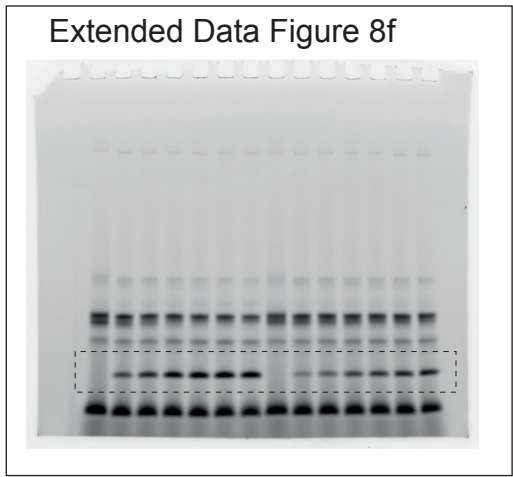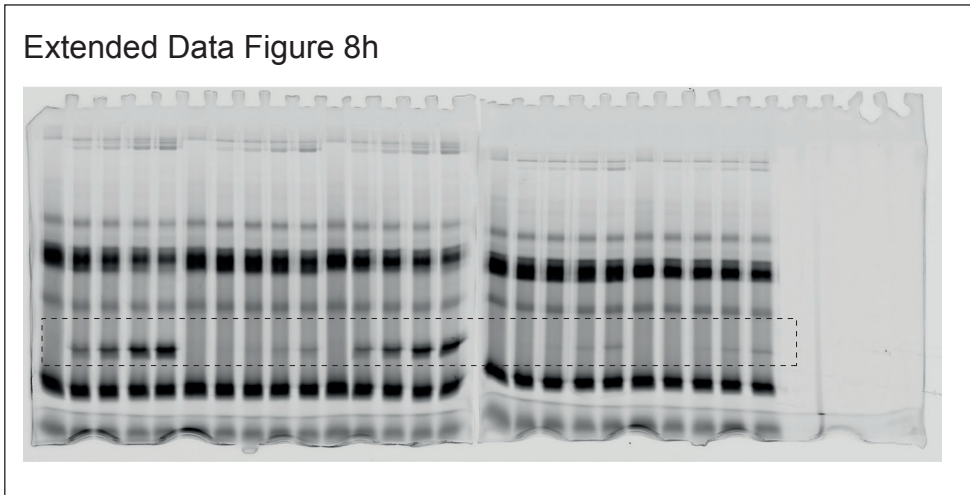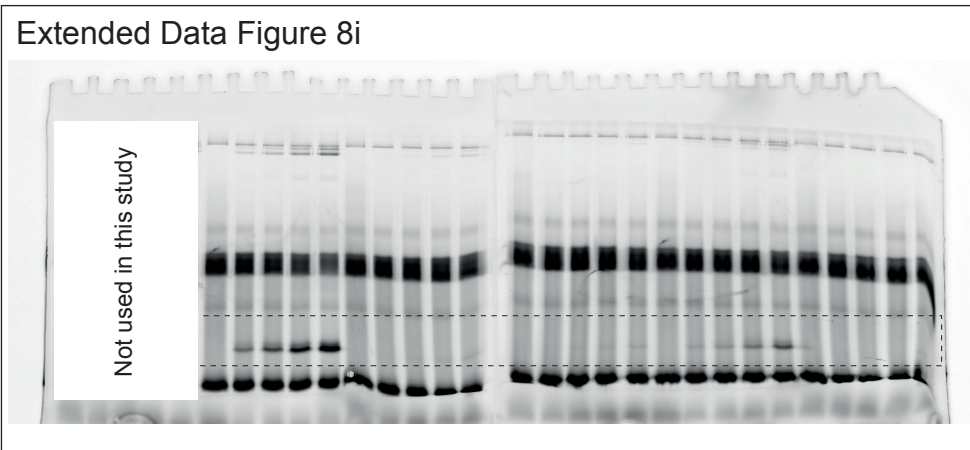

Extended Data Figure 8k

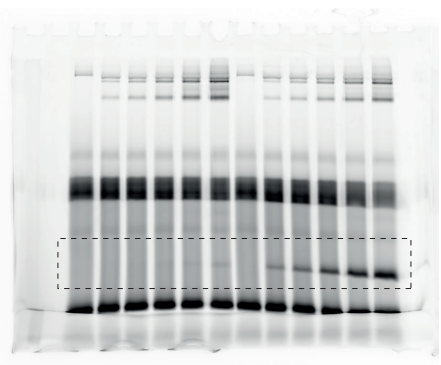

Extended Data Figure 8l

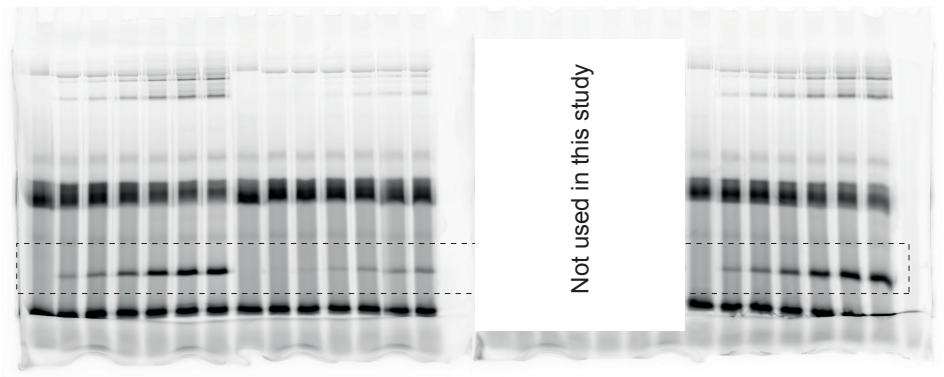

Extended Data Figure 8m

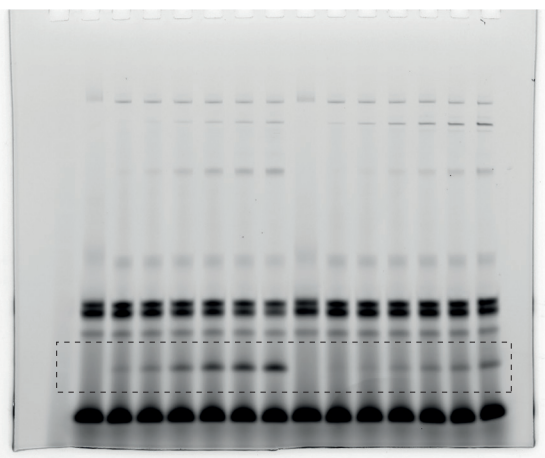

Extended Data Figure 8n upper panel

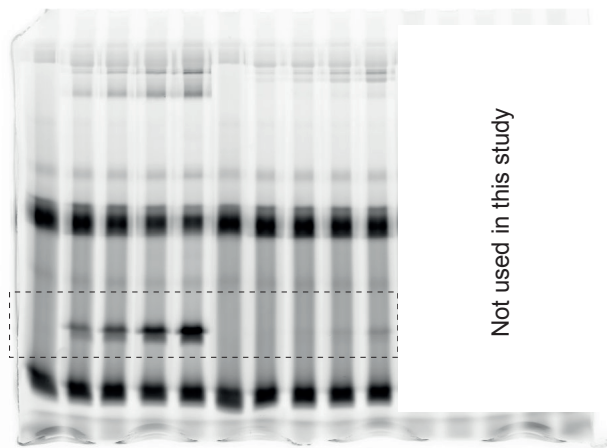

Extended Data Figure 8n lower panel

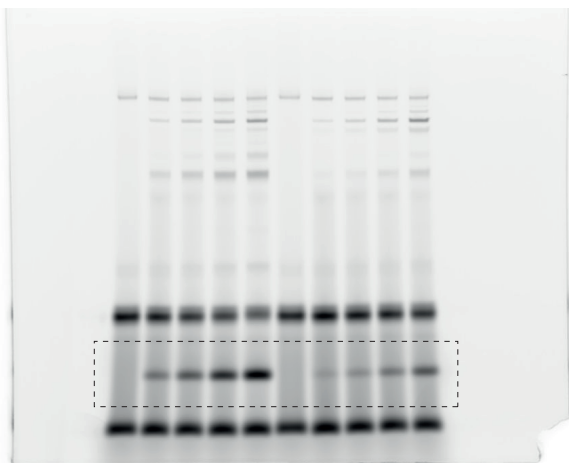

Extended Data Figure 8o

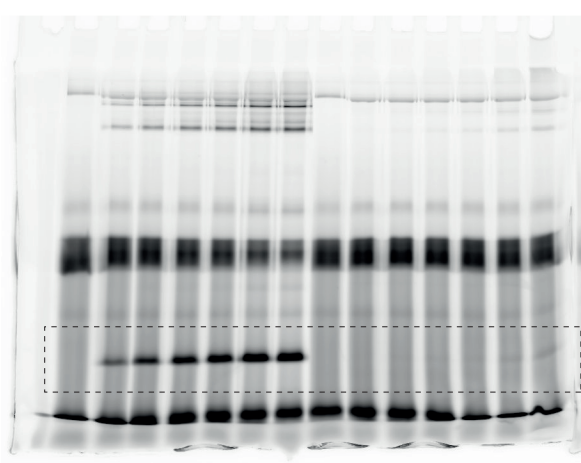

Supplement: EMS85420-supplement-Supplementary_Information_Figure_1.pdf [file EMS85420-supplement-Supplementary_Information_Figure_1.pdf]
